# Supplementary material
Source: PubMed Central journal article supplement (PMC1360595)

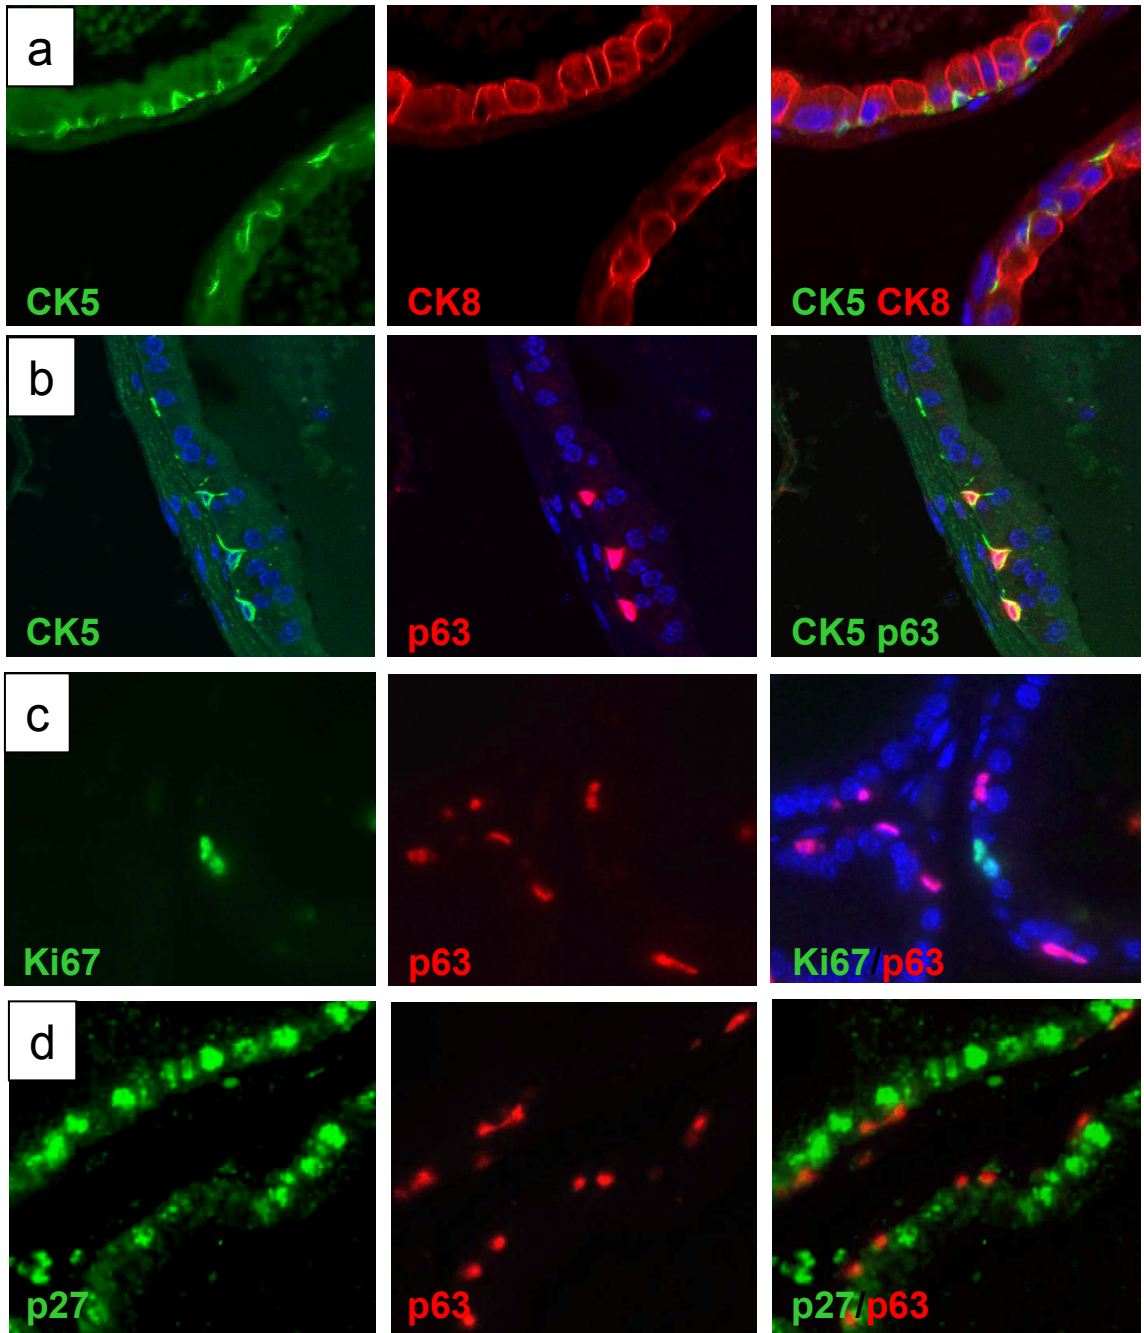

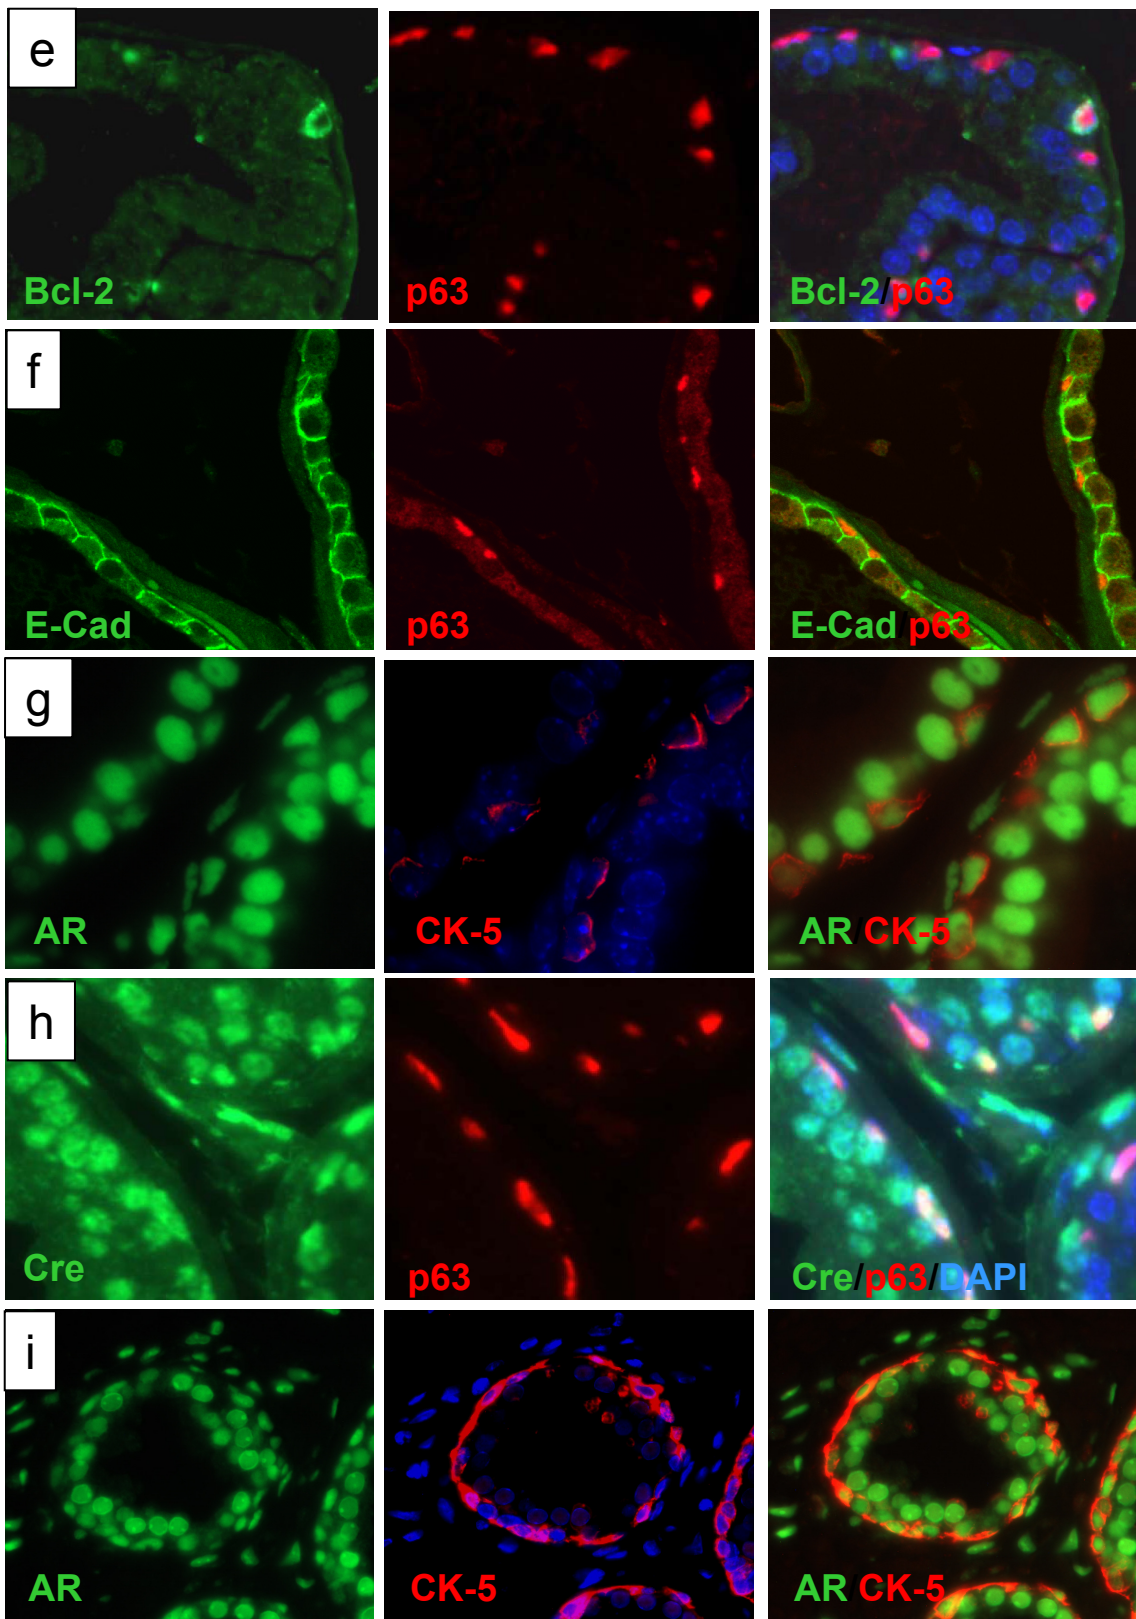

Supplement: pnas_0510652103_1.pdf [file pnas_0510652103_1.pdf]

WT

PIN

Cancer I

Cancer II

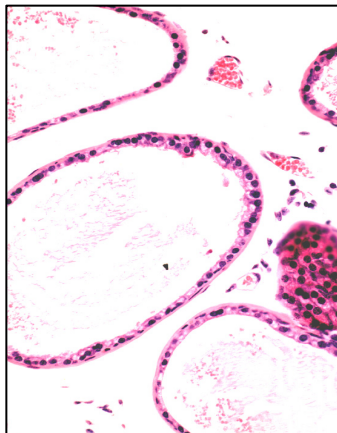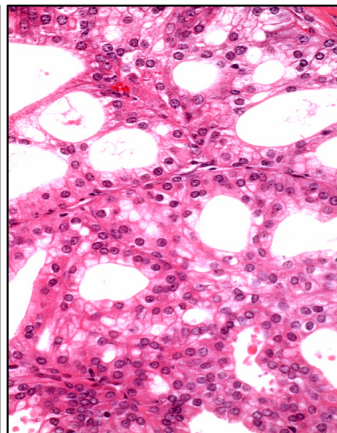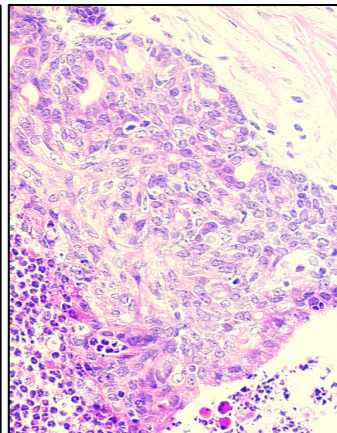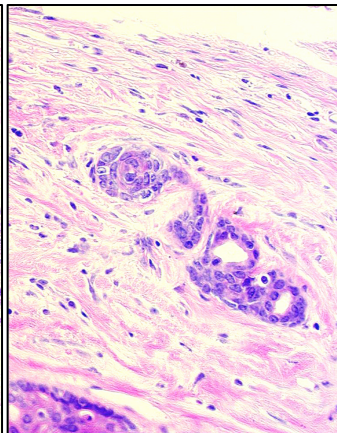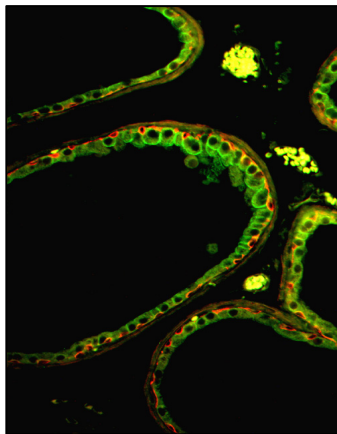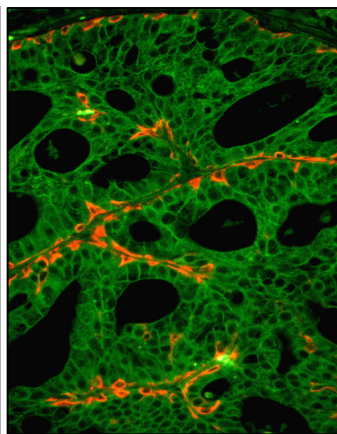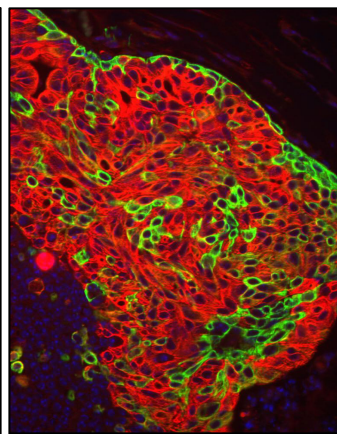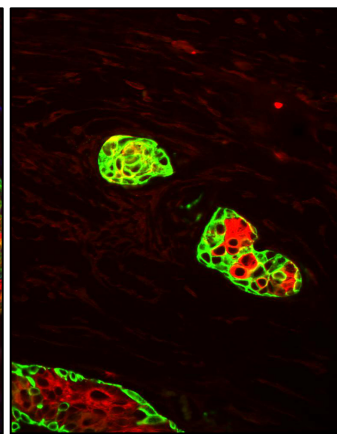IHC:  $\alpha$ -CK5,  $\alpha$ -CK8IHC:  $\alpha$ -CK5,  $\alpha$ -CK8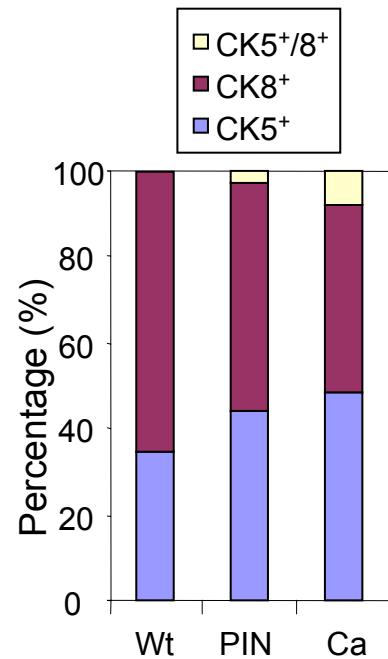

Supplement: pnas_0510652103_2.pdf [file pnas_0510652103_2.pdf]

4 12 28 4 8 12 18 28 wks IB:

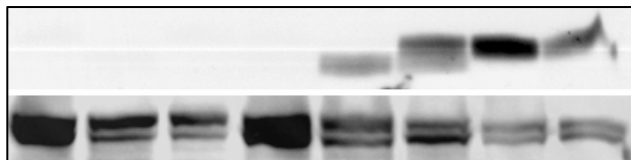

$\alpha$ -Sca-1

$\alpha$ -Vinculin

Control

Mutant

4 12 28 4 8 12 18 28 wks IB:

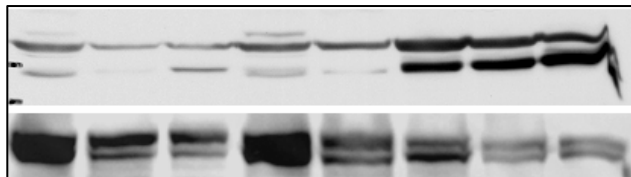

$\alpha$ -p63

$\alpha$ -Vinculin

Control

Mutant

Supplement: pnas_0510652103_3.pdf [file pnas_0510652103_3.pdf]
